# Supplementary material
Source: PubMed Central journal article supplement (PMC7050292)
Supplement: NIHMS1559306-supplement-SI.pdf [file NIHMS1559306-supplement-SI.pdf]

*Supporting Information for*  
**Fourier Transform Infrared Spectroelectrochemistry and Quantitative  
Modeling of Analytes in Kinetically Constrained Redox Mixtures**

Christopher W. John, Denis A. Proshlyakov\*  
Michigan State University, Department of Chemistry

\*Address correspondence to Denis A. Proshlyakov, Dept. of Chemistry, Michigan State University, 578  
S. Shaw Lane, East Lansing, MI 48824, [dapro@chemistry.msu.edu](mailto:dapro@chemistry.msu.edu)

## Table of Contents

|                                                                                                |            |
|------------------------------------------------------------------------------------------------|------------|
| <b>Complete set of ODEs</b> .....                                                              | <b>S-2</b> |
| <b>Runge-Kutta boundary conditions</b> .....                                                   | <b>S-2</b> |
| <b>Figure S-1</b> Potential profile of NPSV .....                                              | <b>S-3</b> |
| <b>Figure S-2</b> Residual error from NPSV/GSR of Mb .....                                     | <b>S-3</b> |
| <b>Figure S-3</b> Complete depiction of the simplified kinetic model .....                     | <b>S-4</b> |
| <b>Figure S-4</b> Comparison of complete and simplified models.....                            | <b>S-4</b> |
| <b>Figure S-5</b> Determination of $k_{lim}$ and $k_{el}^*$ of MG at high concentrations ..... | <b>S-5</b> |
| <b>Figure S-6</b> Concentration dependence of $k_{lim}$ values for MG.....                     | <b>S-5</b> |
| <b>Figure S-7</b> Determination of bimolecular rates.....                                      | <b>S-6</b> |
| <b>Figure S-8</b> Mediator in determining the minimum NPSV pulse duration .....                | <b>S-6</b> |

**Complete set of ODEs for a system with a single mediator and analyte pair.**

$$\frac{dC_{\text{Ox}}^{\text{M}}}{dt} = -k_{\text{f,sol}} C_{\text{Ox}}^{\text{M}} C_{\text{Rd}}^{\text{A}} + k_{\text{r,sol}} C_{\text{Rd}}^{\text{M}} C_{\text{Ox}}^{\text{A}} - k_{\text{on}} C_{\text{Ox}}^{\text{M}} + k_{\text{off}} \Gamma_{\text{Ox}}^{\text{M}}$$

$$\frac{d\Gamma_{\text{Ox}}^{\text{M}}}{dt} = k_{\text{on}} C_{\text{Ox}}^{\text{M}} - k_{\text{off}} \Gamma_{\text{Ox}}^{\text{M}} + k_{\text{f,el}} \Gamma_{\text{Rd}}^{\text{M}} - k_{\text{r,el}} \Gamma_{\text{Ox}}^{\text{M}}$$

$$\frac{dC_{\text{Rd}}^{\text{M}}}{dt} = k_{\text{f,sol}} C_{\text{Ox}}^{\text{M}} C_{\text{Rd}}^{\text{A}} - k_{\text{r,sol}} C_{\text{Rd}}^{\text{M}} C_{\text{Ox}}^{\text{A}} - k_{\text{on}} C_{\text{Rd}}^{\text{M}} + k_{\text{off}} \Gamma_{\text{Rd}}^{\text{M}}$$

$$\frac{d\Gamma_{\text{Rd}}^{\text{M}}}{dt} = k_{\text{on}} C_{\text{Rd}}^{\text{M}} - k_{\text{off}} \Gamma_{\text{Rd}}^{\text{M}} - k_{\text{f,el}} \Gamma_{\text{Rd}}^{\text{M}} + k_{\text{r,el}} \Gamma_{\text{Ox}}^{\text{M}}$$

$$\frac{dC_{\text{Ox}}^{\text{A}}}{dt} = k_{\text{f,sol}} C_{\text{Ox}}^{\text{M}} C_{\text{Rd}}^{\text{A}} - k_{\text{r,sol}} C_{\text{Rd}}^{\text{M}} C_{\text{Ox}}^{\text{A}} - k_{\text{on}} C_{\text{Ox}}^{\text{A}} + k_{\text{off}} \Gamma_{\text{Ox}}^{\text{A}}$$

$$\frac{d\Gamma_{\text{Ox}}^{\text{A}}}{dt} = k_{\text{on}} C_{\text{Ox}}^{\text{A}} - k_{\text{off}} \Gamma_{\text{Ox}}^{\text{A}} + k_{\text{f,el}} \Gamma_{\text{Rd}}^{\text{A}} - k_{\text{r,el}} \Gamma_{\text{Ox}}^{\text{A}}$$

$$\frac{dC_{\text{Rd}}^{\text{A}}}{dt} = -k_{\text{f,sol}} C_{\text{Ox}}^{\text{M}} C_{\text{Rd}}^{\text{A}} + k_{\text{r,sol}} C_{\text{Rd}}^{\text{M}} C_{\text{Ox}}^{\text{A}} - k_{\text{on}} C_{\text{Rd}}^{\text{A}} + k_{\text{off}} \Gamma_{\text{Rd}}^{\text{A}}$$

$$\frac{d\Gamma_{\text{Rd}}^{\text{A}}}{dt} = k_{\text{on}} C_{\text{Rd}}^{\text{A}} - k_{\text{off}} \Gamma_{\text{Rd}}^{\text{A}} - k_{\text{f,el}} \Gamma_{\text{Rd}}^{\text{A}} + k_{\text{r,el}} \Gamma_{\text{Ox}}^{\text{A}}$$

**Runge-Kutta boundary conditions:** The concentration  $C$  (or  $\Gamma$ ) of any component in any phase was

allowed to rise or fall over the complete step  $\Delta t$  to maintain relative change  $\Delta_{\Delta t} C = \frac{C_{t+\Delta t} - C_t}{C_t}$  within the

limits of  $0.5 \leq \Delta_{\Delta t} C \leq 5$ . Relative changes over intermediate sub-steps of Runge-Kutta integration were

afforded wider boundary conditions of  $0.8 \leq \Delta_{\Delta t} C \leq 100$ . If the boundary conditions were violated over

either the intermediate or total step,  $\Delta t$  was iteratively reduced by 90% and the simulation step restarted

until restrictions were met. If the boundary conditions in the preceding step were satisfied, the next  $\Delta t$

was increased by 25%.

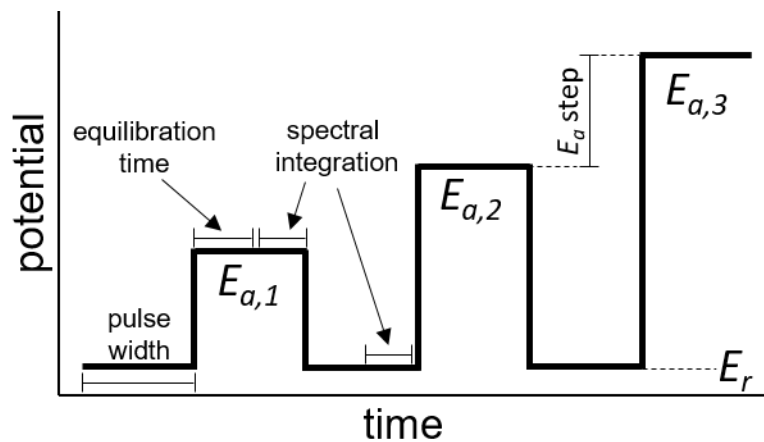

**Figure S-1.** Potential profile of NPSV.  $E_a$  alternates between a constant reference,  $E_r$ , and variable applied,  $E_{a,i}$ , potentials over successive cycles.

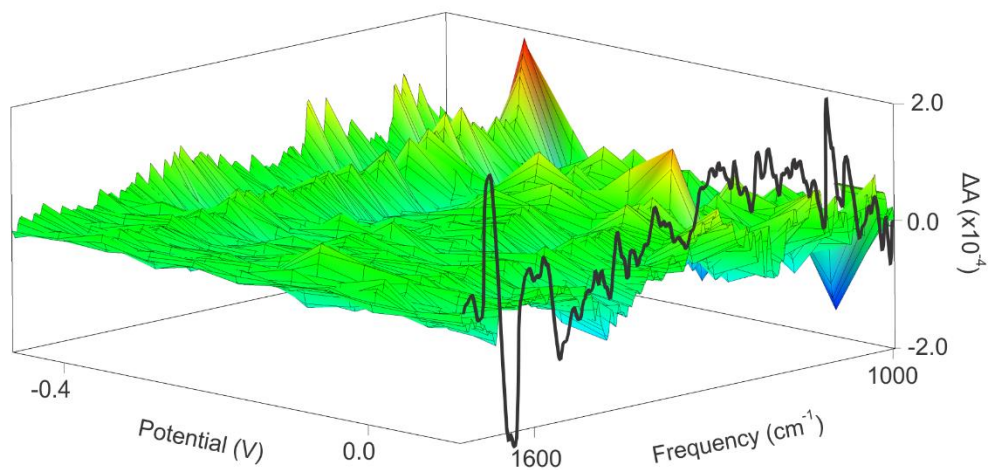

**Figure S-2.** Residual error from NPSV/GSR of Mb. The full occupancy spectrum of Mb is shown for reference.

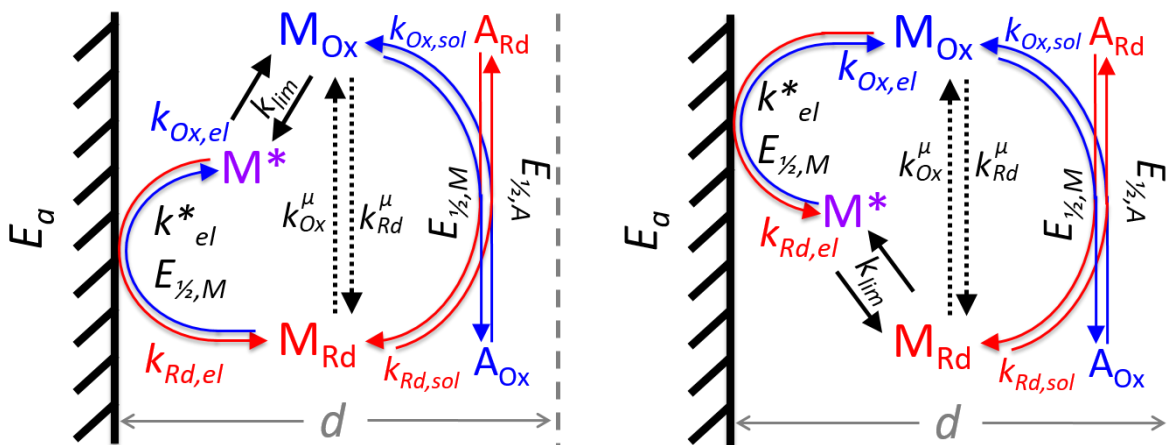

**Figure S-3.** Complete depiction of the reduced kinetic model showing how  $M^*$  can represent  $M_{el,Ox}$  or  $M_{el,Rd}$  and  $k_{lim}$  is the rate constant of the rate limiting step between  $M^*$  and either  $M_{Ox}$  or  $M_{Rd}$ .

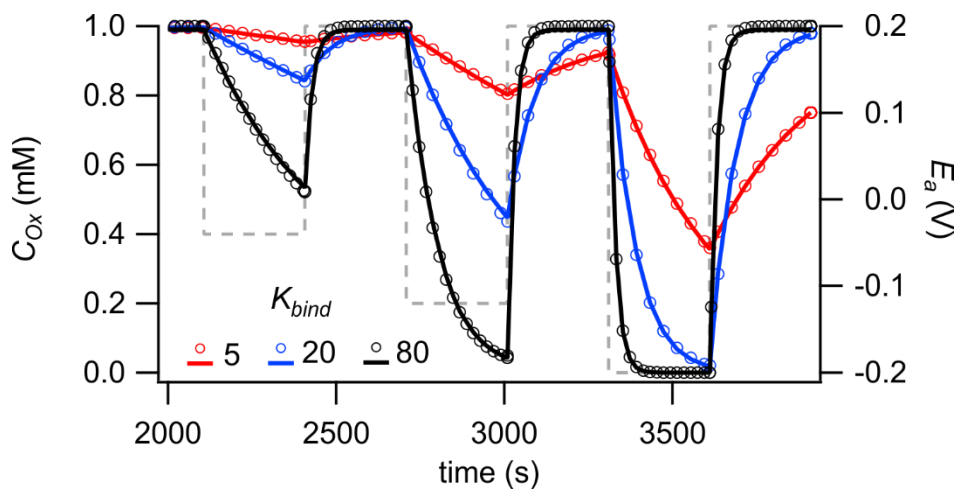

**Figure S-4.** Comparison of NPV concentration profiles of a single analyte calculated by the complete and reduced models (Fig. 4). Complete model simulations (solid lines) at various  $K_{bind}$ , as indicated, and constant  $k_{el}^o$  of  $0.1 \text{ M}^{-1}\text{s}^{-1}$ . The simplified model (open circles) used same parameters in the empirical relationship:  $k_{el}^* = k_{el}^o \times (K_{bind}) \times h$  where  $k_{el}^o = 0.1 \text{ M}^{-1}\text{s}^{-1}$ , the layer thickness ( $h$ ) was  $12 \text{ }\mu\text{m}$ , and  $k_{lim} = k_{on}$ .

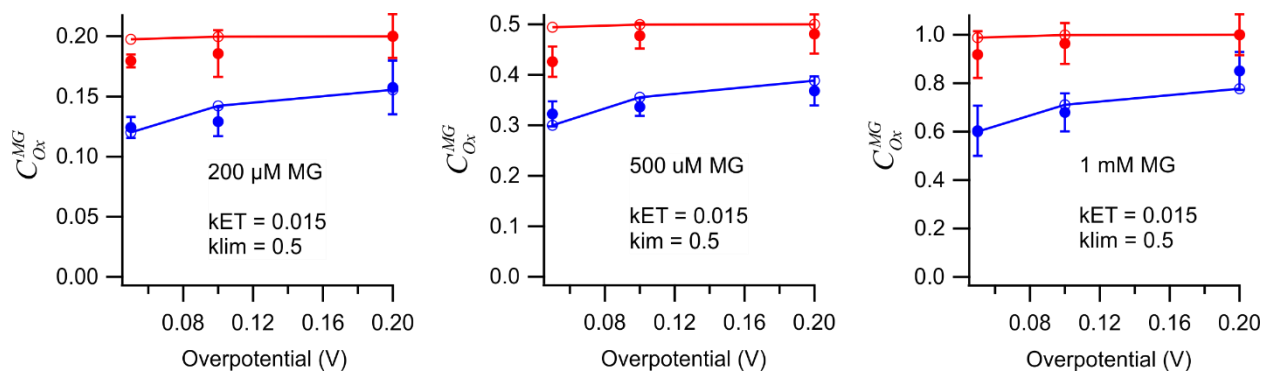

**Figure S-5.** Determination of  $k_{lim}$  and  $k_{el}^*$  of MG at high concentrations. MG samples were prepared in 25 mM Tris, pD 7.0, 0.5 M KCl and transferred to the OTTLE cell for FTIR measurements. MG samples were exposed to 50 mV, 100 mV, and 200 mV overpotentials over 15 s (blue) and 30 s (red) steps. IR spectra were integrated for 15 s. The intensity at  $1603\text{ cm}^{-1}$  was normalized to the intensity of the completely oxidized sample at the same frequency and then multiplied by the concentration of the sample. Experimental data ( $\bullet$ ,  $\bullet$ ) were simulated ( $-\circ-$ ,  $-\circ-$ ) by adjusting the values of  $k_{lim}$  and  $k_{el}^*$  to find the best fit.

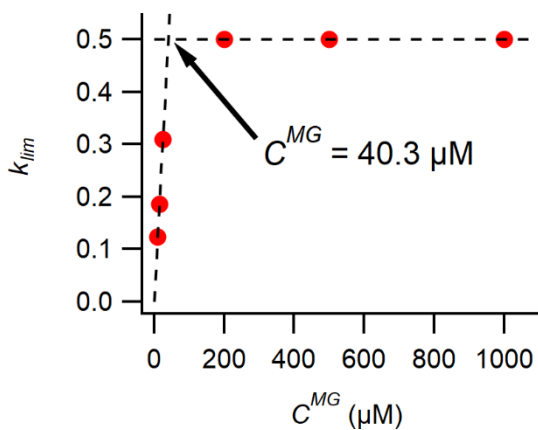

**Figure S-6.**  $k_{lim}$  values for MG determined at various concentrations.  $k_{lim}$  follows a linear profile at low mediator concentrations and reaches a constant value of 0.5 at  $40.3\text{ }\mu\text{M}$  MG.

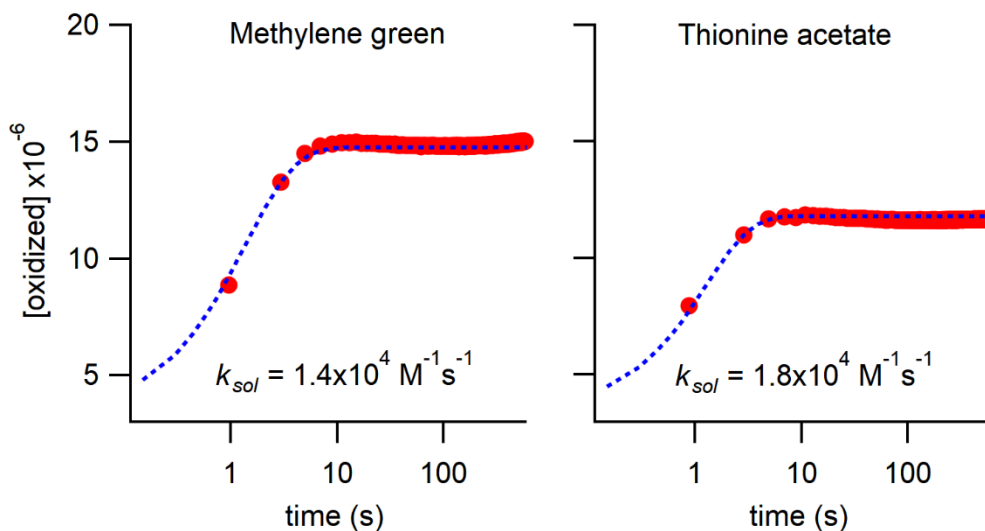

**Figure S-7.** Determination of homogenous bimolecular rates of reactions between mediators and Mb. Optical changes at characteristic wavelengths were recorded in 2 s intervals as a 0.5 molar equivalent of Mb was added to the reduced MG or TA. Absorbance profiles were taken from 611 nm and 598 nm for MG and TA, respectively, and converted to concentrations using their corresponding  $\epsilon$ . The quantitative model was used to find the best  $k_{sol}$  value to simulate (---) the experimental (•) concentration profiles.

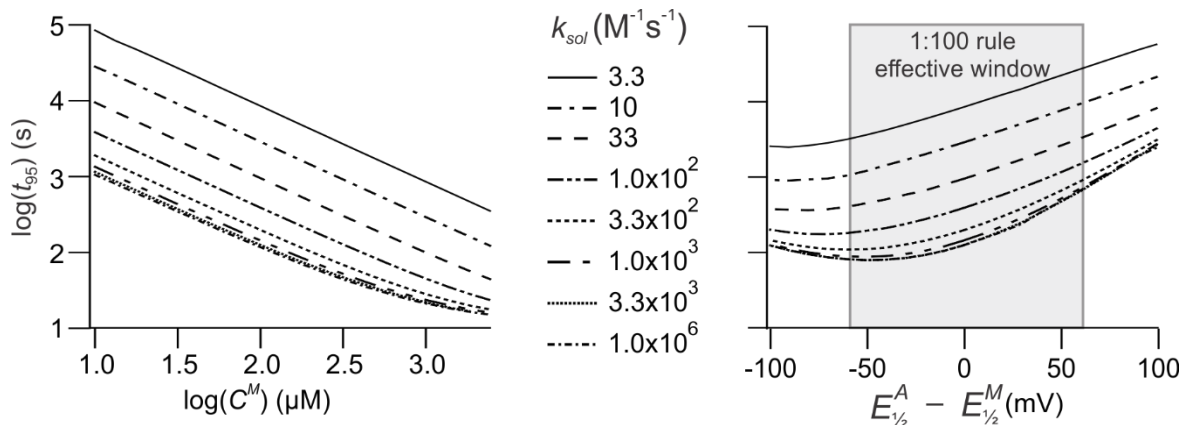

**Figure S-8.** The role of mediator in determining the minimum NPSV pulse duration. The minimal pulse duration ( $t_{95}$ ) is calculated for of an arbitrary 1 mM analyte with  $k_{el}^*$  of 0.1 and  $k_{lim}$  of 0.4 following a potential step of  $E_a = E_{1/2}^A + 100$  mV in the presence of a mediator with given bimolecular rate constant  $k_{sol}$ . *Left:* the effect of mediator concentration at  $E_{1/2}^A = E_{1/2}^M$ . *Right:* the effect of  $E_{1/2}^M$  relative to  $E_{1/2}^A$  for a constant mediator concentration of 100  $\mu$ M.
